# Supplementary material for: CpCAF1 from Chimonanthus praecox Promotes Flowering and Low-Temperature Tolerance When Expressed in Arabidopsis thaliana
Source: MDPI journal article supplement (doi:10.3390/ijms241612945), 2023-08-18
Supplement: s1 [file s1]

Table S1. The primers designed for real-time quantitative PCR.

| Primer name | Primer sequence (5'-3' )    |
|-------------|-----------------------------|
| qCpCAF1-F   | CAAATCAGAGAGGTATGGAACGACAAT |
| qCpCAF1-R   | GTAGTCGGACGTGGTCTTGAAGTTG   |
| CpActin-F   | GTTATGGTTGGGATGGGACAGAAAG   |
| CpActin-R   | GGGCTTCAGTAAGGAAACAGGA      |
| CpTublin-F  | TAGTGACAAGACAGTAGGTGGAGGT   |
| CpTublin-R  | GTAGGTTCCAGTCCTCACTTCATC    |
| AtActin-F   | GTTTCGTCTTCCACTTCAG         |
| AtActin-R   | ATCATACCAGTCTCAACAC         |
| AtFT-F      | TTCCAAGTCCTAGCAACCCTCACC    |
| AtFT-R      | TTCTTCCTCCGACGCACTCTC       |
| AtFLC-F     | CCTAATTTGATCCTCAGGTTTGGG    |
| AtFLC-R     | CCGACGAAGAAAAAGTAGATAGGCAC  |
| AtSOC1-F    | GCTCTCAGTGCTTTGTGATGC       |
| AtSOC1-R    | AAGAACGTACTTGGAGCTGGC       |
| AtELF3-F    | CTGGACCATCTAGTCAGCCTTG      |
| AtELF3-R    | TGCCATGAGACTGAGATCTTCTTG    |

Table S2. PCR Primers used for cloning *CpCAF1* promoter and deletion fragment.

| Name           | Primer sequence (5'-3' )                   | Distance to TSS |
|----------------|--------------------------------------------|-----------------|
| CpCAF1pro-F    | G <b>CTCTAG</b> AGTGTAAGTGAAGAATTAAGAATTG  | −1908           |
| CpCAF1pro-P2-F | G <b>CTCTAG</b> AGAAACTGATGTCAAATTGGGTTAAT | −1646           |
| CpCAF1pro-P3-F | G <b>CTCTAG</b> ATAAGGTTCAATACTTCTGTGACATG | −941            |
| CpCAF1pro-R    | CATG <b>CCATGG</b> CTTCTCTCTTTTCCTTTTTTT   | +224            |
| CpCAF1pro-P1-R | CATG <b>CCATGG</b> CGGGAGGGCTAGGGAAAG      | +2              |

Note: The restriction sites are indicated in bold, *Xba*I: TCTAGA , *Nco*I: CCATGG.
